# Supplementary material for: Testing the impact of stratigraphic uncertainty on spectral analyses of sedimentary series
Source: Copernicus journal article supplement (doi:10.5194/cp-12-1765-2016), 2016-09-02
Supplement: Supplementary file 1 [file cp-12-1765-2016-supplement.zip]

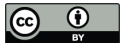

## *Supplement of*

# **Testing the impact of stratigraphic uncertainty on spectral analyses of sedimentary series**

**Mathieu Martinez et al.**

*Correspondence to:* Mathieu Martinez ([mmartinez@marum.de](mailto:mmartinez@marum.de))

- cp-12-1765-2016-supplement-title-page.pdf
- TestUncertainty\_MTM\_LCH\_GR\_verified.R
- TestUncertainty\_MTM\_LTH\_MS\_verified.R
- TestUncertainty\_MTM\_Sinusoids\_verified.R
- TestUncertainty\_Redfit\_LCH\_GR\_verified.R
- TestUncertainty\_Redfit\_LTH\_MS\_verified.R
- TestUncertainty\_Redfit\_Sinusoids\_verified.R
- opt\_linterp.R

The copyright of individual parts of the supplement might differ from the CC-BY 3.0 licence.
